# Supplementary material
Source: publisher site journal article supplement (https://www.dovepress.com/article/299376)

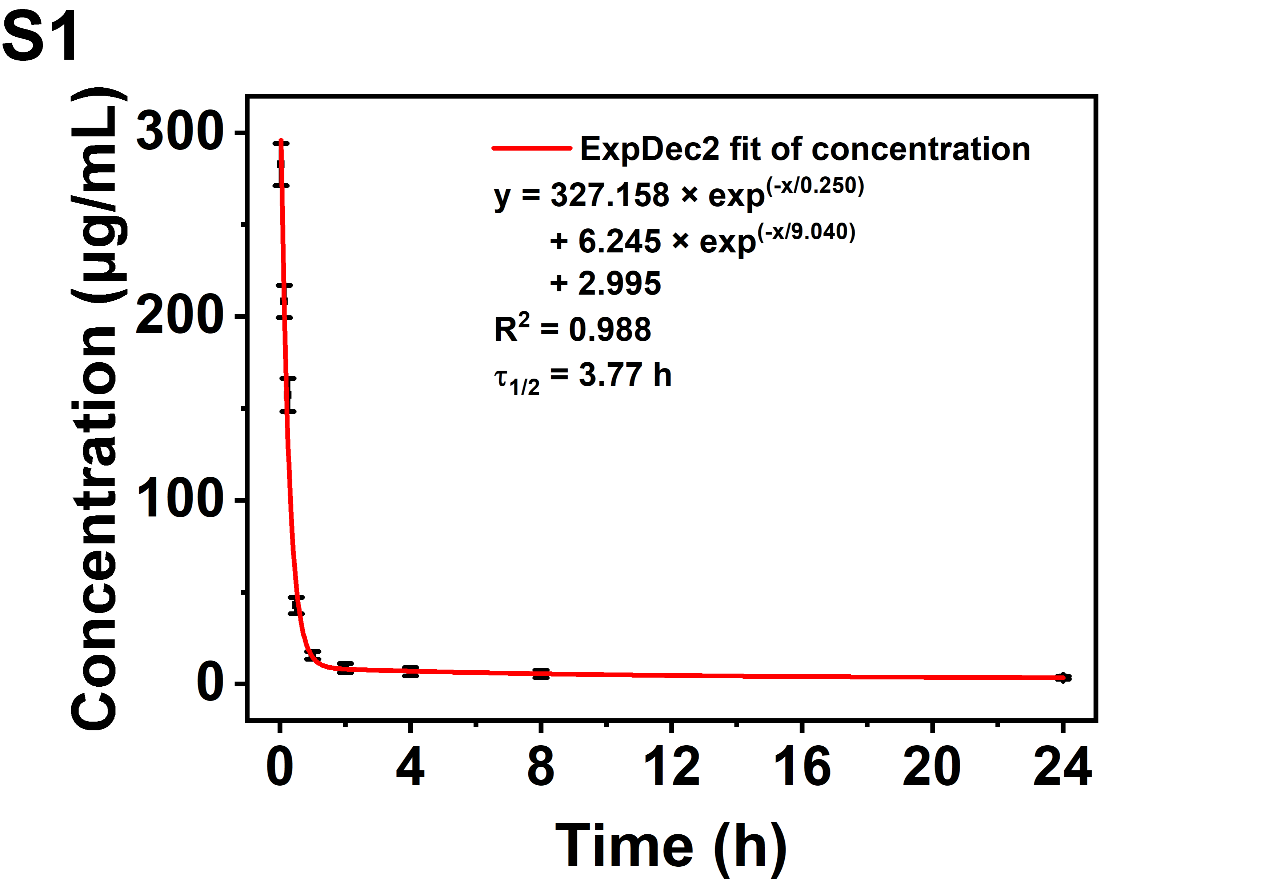


Additional file 1: Figure S1. The in vivo circulation half-life of the FBPD NPs.

Supplement: Supplementary file 1 [file get_supplementary_file.php]
